# Supplementary material for: Development of Taiwan Risk Score for Sarcopenia (TRSS) for Sarcopenia Screening among Community-Dwelling Older Adults
Source: PubMed Central journal article supplement (PMC7216229; doi:10.3390/ijerph17082859), 2020-04-21
Supplement: ijerph-17-02859-s001.pdf [file ijerph-17-02859-s001.pdf]

Supplementary material

Table S1. Correlation matrix of variables listed in Table 2.

| Pearson Correlation Coefficients, N = 1025 |        |        |         |                |            |         |        |        |         |          |        |        |        |        |        |        |         |        |          |        |        |
|--------------------------------------------|--------|--------|---------|----------------|------------|---------|--------|--------|---------|----------|--------|--------|--------|--------|--------|--------|---------|--------|----------|--------|--------|
| Prob >  r  under H0: Rho=0                 |        |        |         |                |            |         |        |        |         |          |        |        |        |        |        |        |         |        |          |        |        |
|                                            | female | age4   | low_edu | marital_status | low_income | pension | uw     | cigar  | alcohol | no_sport | ht     | dm     | hd     | lip    | cva    | ifg    | ab_ldl  | ab_cr  | ab_egf_r | ab_hdl | ab_TG  |
| female                                     | 1      | -      | 0.16115 | 0.09124        | -0.02737   | -       | 0.0283 | -      | -       | 0.03385  | 0.0189 | 0.0022 | -      | -      | -      | -      | 0.0878  | -      | -        | -      | 0.0482 |
|                                            |        | 0.0539 |         |                |            | 0.0543  | 6      | 0.2514 | 0.2907  |          | 7      | 5      | 0.0244 | 0.0615 | 0.0336 | 0.0453 | 6       | 0.1202 | 0.1674   | 0.1892 | 8      |
|                                            |        | 6      |         |                |            | 6       |        | 2      | 2       |          |        |        | 4      | 6      | 1      | 9      |         | 2      | 6        | 9      |        |
|                                            |        | 0.0842 | <.0001  | 0.0035         | 0.3813     | 0.0819  | 0.3643 | <.0001 | <.0001  | 0.279    | 0.5441 | 0.9426 | 0.4345 | 0.0488 | 0.2823 | 0.1464 | 0.0049  | 0.0001 | <.0001   | <.0001 | 0.1224 |
| age4                                       | -      | 1      | 0.20973 | 0.08721        | 0.03508    | 0.0570  | 0.0563 | -      | -0.0996 | 0.07218  | 0.1135 | 0.0081 | 0.1129 | -      | 0.0474 | 0.0525 | -0.0633 | 0.1549 | 0.2024   | 0.0134 | -      |
|                                            | 0.0539 |        |         |                |            | 9       | 5      | 0.1002 |         |          | 8      | 1      | 4      | 0.0790 |        | 1      |         | 6      | 4        | 2      | 0.0203 |
|                                            | 6      |        |         |                |            |         |        | 1      |         |          |        |        |        | 8      |        |        |         |        |          |        | 4      |
|                                            |        | 0.0842 | <.0001  | 0.0052         | 0.2618     | 0.0677  | 0.0713 | 0.0013 | 0.0014  | 0.0208   | 0.0003 | 0.7954 | 0.0003 | 0.0113 | 0.1294 | 0.0929 | 0.0427  | <.0001 | <.0001   | 0.6679 | 0.5153 |
| low_edu                                    | 0.1611 | 0.2097 | 1       | 0.02844        | 0.02388    | 0.0703  | 0.0218 | -      | -       | 0.09822  | 0.0781 | 0.0348 | 0.0885 | -      | 0.0110 | 0.0738 | -0.0098 | 0.0258 | 0.0023   | 0.0276 | -      |
|                                            | 5      | 3      |         |                |            | 3       | 7      | 0.0855 | 0.0784  |          | 2      | 1      | 7      | 0.0576 | 7      | 7      |         | 6      | 6        | 7      | 0.0007 |
|                                            |        |        |         |                |            |         |        | 1      | 8       |          |        |        |        | 2      |        |        |         |        |          |        | 9      |
|                                            | <.0001 | <.0001 |         | 0.363          | 0.4449     | 0.0243  | 0.4842 | 0.0062 | 0.012   | 0.0016   | 0.0124 | 0.2655 | 0.0045 | 0.0652 | 0.7233 | 0.018  | 0.7541  | 0.4082 | 0.9399   | 0.3761 | 0.9799 |
| marital_status                             | 0.0912 | 0.0872 | 0.02844 | 1              | 0.11768    | 0.0324  | 0.0520 | 0.0084 | 0.0045  | -        | 0.0019 | -      | 0.0447 | -      | -      | -      | -       | 0.0206 | -        | -      | 0.0076 |
|                                            | 4      | 1      |         |                |            | 4       | 1      |        | 6       | 0.00081  |        |        |        | 0.0597 | 0.0211 | 0.0157 | 0.0219  | 2      | 0.0117   | 0.0071 | 6      |
|                                            |        |        |         |                |            |         |        |        |         |          |        | 2      |        | 7      | 2      | 1      | 4       |        | 2        | 3      |        |
|                                            | 0.0035 | 0.0052 | 0.363   |                | 0.0002     | 0.2995  | 0.0961 | 0.7881 | 0.8841  | 0.9792   | 0.9517 | 0.5304 | 0.1527 | 0.0558 | 0.4994 | 0.6154 | 0.4829  | 0.5095 | 0.7079   | 0.8196 | 0.8065 |
| low_income                                 | -      | 0.0350 | 0.02388 | 0.11768        | 1          | 0.3064  | 0.1206 | -      | -       | 0.03313  | 0.0596 | 0.0437 | 0.0470 | -      | -      | -      | -       | 0.0803 | 0.0070   | 0.0000 | -      |
|                                            | 0.0273 | 8      |         |                |            | 4       |        | 0.0156 | 0.0233  |          | 1      | 7      | 2      | 0.0070 | 0.0264 | 0.0137 | 0.0296  | 7      | 5        | 6      | 0.0034 |

|                 |             |             |         |          |          |        |                  |             |             |         |             |             |             |             |             |             |             |        |             |             |             |
|-----------------|-------------|-------------|---------|----------|----------|--------|------------------|-------------|-------------|---------|-------------|-------------|-------------|-------------|-------------|-------------|-------------|--------|-------------|-------------|-------------|
|                 | 7           |             |         |          |          |        |                  | 6           | 4           |         |             |             |             | 2           | 2           | 3           | 2           |        |             |             | 6           |
|                 | 0.3813      | 0.2618      | 0.4449  | 0.0002   |          | <.0001 | 0.0001           | 0.6166      | 0.4555      | 0.2892  | 0.0564      | 0.1614      | 0.1325      | 0.8224      | 0.3981      | 0.6605      | 0.3435      | 0.0101 | 0.8216      | 0.9985      | 0.9118      |
| <b>pension</b>  | -           | 0.0570      | 0.07033 | 0.03244  | 0.30644  | 1      | -                | -           | -           | 0.04682 | 0.0374      | 0.0598      | 0.0326      | -           | 0.0275      | 0.0107      | -           | 0.1203 | 0.0718      | 0.0174      | 0.0187      |
|                 | 0.0543<br>6 | 9           |         |          |          |        | 0.0063<br>8      | 0.0303<br>4 | 0.0068<br>4 |         | 5           |             | 5           | 0.0003<br>8 | 8           | 4           | 0.0394<br>4 | 6      | 2           | 3           | 3           |
|                 | 0.0819      | 0.0677      | 0.0243  | 0.2995   | <.0001   |        | 0.8384           | 0.3319      | 0.827       | 0.1341  | 0.2309      | 0.0556      | 0.2963      | 0.9903      | 0.3778      | 0.7312      | 0.2071      | 0.0001 | 0.0215      | 0.5773      | 0.5493      |
| <b>uw</b>       | 0.0283<br>6 | 0.0563<br>5 | 0.02187 | 0.05201  | 0.1206   | -      | 1<br>0.0063<br>8 | -           | -           | -       | -           | -           | 0.0477      | -           | -           | -           | -           | 0.0357 | 0.0081      | -           | -           |
|                 |             |             |         |          |          |        |                  | 0.0061<br>5 | 0.0658<br>4 | 0.03663 | 0.0877<br>1 | 0.0437<br>1 | 3           | 0.0419<br>2 | 0.0306<br>3 | 0.0278<br>2 | 0.0425<br>3 | 3      | 8           | 0.0678<br>1 | 0.0674<br>7 |
|                 | 0.3643      | 0.0713      | 0.4842  | 0.0961   | 0.0001   | 0.8384 |                  | 0.8442      | 0.0351      | 0.2413  | 0.005       | 0.162       | 0.1267      | 0.1799      | 0.3272      | 0.3736      | 0.1736      | 0.2531 | 0.7937      | 0.0299      | 0.0308      |
| <b>cigar</b>    | -           | -           | -       | 0.0084   | -0.01566 | -      | -                | 1           | 0.2791      | 0.01447 | -           | 0.0158      | -           | -           | -           | 0.0463      | 0.0125      | 0.0422 | 0.0467      | 0.0249      | -           |
|                 | 0.2514<br>2 | 0.1002<br>1 | 0.08551 |          |          |        | 0.0303<br>4      | 0.0061<br>5 | 8           |         | 0.0104<br>7 | 6           | 0.0024<br>9 | 0.0124<br>2 | 0.0211<br>9 | 9           | 5           | 3      | 9           | 5           | 0.0024<br>1 |
|                 | <.0001      | 0.0013      | 0.0062  | 0.7881   | 0.6166   | 0.3319 | 0.8442           |             | <.0001      | 0.6435  | 0.7379      | 0.6121      | 0.9365      | 0.6913      | 0.498       | 0.1377      | 0.6881      | 0.1767 | 0.1344      | 0.4249      | 0.9387      |
| <b>alcohol</b>  | -           | -0.0996     | -       | 0.00456  | -0.02334 | -      | -                | 0.2791      | 1           | -       | -           | -           | -           | 0.0514      | -           | 0.0231      | -           | 0.0037 | -           | 0.0144      | 0.0150      |
|                 | 0.2907<br>2 |             | 0.07848 |          |          |        | 0.0068<br>4      | 0.0658<br>4 | 8           | 0.03078 | 0.0584<br>3 | 0.0542<br>6 | 0.0277<br>4 | 3           | 0.0625<br>8 | 2           | 0.0103<br>3 | 9      | 0.0065<br>2 | 8           | 4           |
|                 | <.0001      | 0.0014      | 0.012   | 0.8841   | 0.4555   | 0.827  | 0.0351           | <.0001      |             | 0.3248  | 0.0615      | 0.0825      | 0.375       | 0.0998      | 0.0452      | 0.4598      | 0.7412      | 0.9035 | 0.8349      | 0.6433      | 0.6305      |
| <b>no_sport</b> | 0.0338<br>5 | 0.0721<br>8 | 0.09822 | -0.00081 | 0.03313  | 0.0468 | -                | 0.0144      | -           | 1       | 0.0133      | 0.0263      | -           | -           | 0.0906      | 0.0151      | 0.0260      | 0.0757 | 0.0682      | 0.0874      | -           |
|                 |             |             |         |          |          |        | 0.0366<br>3      | 7           | 0.0307<br>8 |         | 3           |             | 0.0214<br>3 | 0.0470<br>4 | 3           | 6           | 1           | 9      | 8           | 1           | 0.0011<br>7 |
|                 | 0.279       | 0.0208      | 0.0016  | 0.9792   | 0.2892   | 0.1341 | 0.2413           | 0.6435      | 0.3248      |         | 0.67        | 0.4002      | 0.4931      | 0.1324      | 0.0037      | 0.6278      | 0.4056      | 0.0152 | 0.0288      | 0.0051      | 0.9701      |
| <b>ht</b>       | 0.0189<br>7 | 0.1135<br>8 | 0.07812 | 0.0019   | 0.05961  | 0.0374 | -                | -           | -           | 0.01333 | 1           | 0.1934      | 0.0247      | 0.0816      | 0.0787      | 0.1139      | -           | 0.0717 | 0.0917      | 0.0810      | 0.0478      |
|                 |             |             |         |          |          | 5      | 0.0877<br>1      | 0.0104<br>7 | 0.0584<br>3 |         |             | 6           | 1           | 4           | 3           | 7           | 0.1037<br>4 | 7      | 9           | 4           | 3           |

|               |        |         |         |          |          |        |        |        |        |         |        |        |        |        |        |        |         |        |         |        |        |
|---------------|--------|---------|---------|----------|----------|--------|--------|--------|--------|---------|--------|--------|--------|--------|--------|--------|---------|--------|---------|--------|--------|
|               | 0.5441 | 0.0003  | 0.0124  | 0.9517   | 0.0564   | 0.2309 | 0.005  | 0.7379 | 0.0615 | 0.67    |        | <.0001 | 0.4294 | 0.0089 | 0.0117 | 0.0003 | 0.0009  | 0.0216 | 0.0033  | 0.0094 | 0.126  |
| <b>dm</b>     | 0.0022 | 0.0081  | 0.03481 | -0.01962 | 0.04377  | 0.0598 | -      | 0.0158 | -      | 0.0263  | 0.1934 | 1      | 0.0527 | 0.1865 | 0.0275 | 0.4613 | -       | 0.1871 | 0.0923  | 0.1233 | 0.0113 |
|               | 5      | 1       |         |          |          |        | 0.0437 | 6      | 0.0542 |         | 6      |        | 4      | 5      | 9      | 7      | 0.1573  | 8      | 5       | 4      | 7      |
|               | 0.9426 | 0.7954  | 0.2655  | 0.5304   | 0.1614   | 0.0556 | 0.162  | 0.6121 | 0.0825 | 0.4002  | <.0001 |        | 0.0915 | <.0001 | 0.3775 | <.0001 | <.0001  | <.0001 | 0.0031  | <.0001 | 0.7162 |
| <b>hd</b>     | -      | 0.1129  | 0.08857 | 0.0447   | 0.04702  | 0.0326 | 0.0477 | -      | -      | -       | 0.0247 | 0.0527 | 1      | 0.0735 | 0.0980 | 0.0061 | -       | 0.1464 | 0.1111  | 0.0362 | -      |
|               | 0.0244 | 4       |         |          |          | 5      | 3      | 0.0024 | 0.0277 | 0.02143 | 1      | 4      | 7      | 4      | 5      | 0.0862 | 5       | 5      | 3       | 0.0213 |        |
|               | 4      |         |         |          |          |        | 9      | 4      |        |         |        |        |        |        |        | 6      |         |        |         |        | 7      |
|               | 0.4345 | 0.0003  | 0.0045  | 0.1527   | 0.1325   | 0.2963 | 0.1267 | 0.9365 | 0.375  | 0.4931  | 0.4294 | 0.0915 |        | 0.0185 | 0.0017 | 0.8442 | 0.0057  | <.0001 | 0.0004  | 0.2465 | 0.4943 |
| <b>lip</b>    | -      | -       | -       | -0.05977 | -0.00702 | -      | -      | -      | 0.0514 | -       | 0.0816 | 0.1865 | 0.0735 | 1      | 0.0398 | 0.0575 | -       | 0.0189 | -0.0126 | 0.0717 | 0.0797 |
|               | 0.0615 | 0.0790  | 0.05762 |          |          | 0.0003 | 0.0419 | 0.0124 | 3      | 0.04704 | 4      | 5      | 7      | 7      | 3      | 0.0450 | 8       |        | 2       | 6      |        |
|               | 6      | 8       |         |          |          | 8      | 2      | 2      |        |         |        |        |        |        |        | 6      |         |        |         |        |        |
|               | 0.0488 | 0.0113  | 0.0652  | 0.0558   | 0.8224   | 0.9903 | 0.1799 | 0.6913 | 0.0998 | 0.1324  | 0.0089 | <.0001 | 0.0185 |        | 0.2022 | 0.0656 | 0.1494  | 0.5438 | 0.6869  | 0.0217 | 0.0106 |
| <b>cva</b>    | -      | 0.0474  | 0.01107 | -0.02112 | -0.02642 | 0.0275 | -      | -      | -      | 0.09063 | 0.0787 | 0.0275 | 0.0980 | 0.0398 | 1      | -      | -       | 0.0424 | 0.0043  | 0.0601 | 0.0098 |
|               | 0.0336 |         |         |          |          | 8      | 0.0306 | 0.0211 | 0.0625 |         | 3      | 9      | 4      | 7      |        | 0.0042 | 0.0718  | 3      | 2       | 3      | 5      |
|               | 1      |         |         |          |          | 3      | 9      | 8      |        |         |        |        |        |        | 2      | 6      |         |        |         |        |        |
|               | 0.2823 | 0.1294  | 0.7233  | 0.4994   | 0.3981   | 0.3778 | 0.3272 | 0.498  | 0.0452 | 0.0037  | 0.0117 | 0.3775 | 0.0017 | 0.2022 |        | 0.8927 | 0.0214  | 0.1746 | 0.89    | 0.0543 | 0.7528 |
| <b>ifg</b>    | -      | 0.0525  | 0.07387 | -0.01571 | -0.01373 | 0.0107 | -      | 0.0463 | 0.0231 | 0.01516 | 0.1139 | 0.4613 | 0.0061 | 0.0575 | -      | 1      | -       | 0.1865 | 0.1046  | 0.0822 | 0.0691 |
|               | 0.0453 | 1       |         |          |          | 4      | 0.0278 | 9      | 2      |         | 7      | 7      | 5      | 3      | 0.0042 |        | 0.0863  | 8      | 2       | 6      | 8      |
|               | 9      |         |         |          |          | 2      |        |        |        |         |        |        |        | 2      |        | 6      |         |        |         |        |        |
|               | 0.1464 | 0.0929  | 0.018   | 0.6154   | 0.6605   | 0.7312 | 0.3736 | 0.1377 | 0.4598 | 0.6278  | 0.0003 | <.0001 | 0.8442 | 0.0656 | 0.8927 |        | 0.0057  | <.0001 | 0.0008  | 0.0084 | 0.0268 |
| <b>ab_ldl</b> | 0.0878 | -0.0633 | -0.0098 | -0.02194 | -0.02962 | -      | -      | 0.0125 | -      | 0.02601 | -      | -      | -      | -      | -      | 1      | -0.0835 | -      | -       | 0.1195 |        |
|               | 6      |         |         |          |          | 0.0394 | 0.0425 | 5      | 0.0103 |         | 0.1037 | 0.1573 | 0.0862 | 0.0450 | 0.0718 | 0.0863 |         |        | 0.1079  | 0.0959 | 9      |
|               |        |         |         |          |          | 4      | 3      |        | 3      |         | 4      | 6      | 6      | 6      | 6      | 6      |         |        | 1       | 6      |        |
|               | 0.0049 | 0.0427  | 0.7541  | 0.4829   | 0.3435   | 0.2071 | 0.1736 | 0.6881 | 0.7412 | 0.4056  | 0.0009 | <.0001 | 0.0057 | 0.1494 | 0.0214 | 0.0057 |         | 0.0075 | 0.0005  | 0.0021 | 0.0001 |

|         |             |        |         |          |          |        |        |        |        |         |        |        |        |         |        |        |         |        |        |        |        |
|---------|-------------|--------|---------|----------|----------|--------|--------|--------|--------|---------|--------|--------|--------|---------|--------|--------|---------|--------|--------|--------|--------|
| ab_cr   | -           | 0.1549 | 0.02586 | 0.02062  | 0.08037  | 0.1203 | 0.0357 | 0.0422 | 0.0037 | 0.07579 | 0.0717 | 0.1871 | 0.1464 | 0.0189  | 0.0424 | 0.1865 | -0.0835 | 1      | 0.4716 | 0.1091 | -      |
|         | 0.1202<br>2 | 6      |         |          |          | 6      | 3      | 3      | 9      |         | 7      | 8      | 5      | 8       | 3      | 8      |         |        | 9      | 8      | 0.0028 |
|         | 0.0001      | <.0001 | 0.4082  | 0.5095   | 0.0101   | 0.0001 | 0.2531 | 0.1767 | 0.9035 | 0.0152  | 0.0216 | <.0001 | <.0001 | 0.5438  | 0.1746 | <.0001 | 0.0075  |        | <.0001 | 0.0005 | 0.9266 |
| ab_egfr | -           | 0.2024 | 0.00236 | -0.01172 | 0.00705  | 0.0718 | 0.0081 | 0.0467 | -      | 0.06828 | 0.0917 | 0.0923 | 0.1111 | -0.0126 | 0.0043 | 0.1046 | -       | 0.4716 | 1      | 0.1048 | 0.0383 |
|         | 0.1674<br>6 | 4      |         |          |          | 2      | 8      | 9      | 0.0065 |         | 9      | 5      | 5      |         | 2      | 2      | 0.1079  | 9      |        | 4      | 4      |
|         | <.0001      | <.0001 | 0.9399  | 0.7079   | 0.8216   | 0.0215 | 0.7937 | 0.1344 | 0.8349 | 0.0288  | 0.0033 | 0.0031 | 0.0004 | 0.6869  | 0.89   | 0.0008 | 0.0005  | <.0001 |        | 0.0008 | 0.22   |
| ab_hdl  | -           | 0.0134 | 0.02767 | -0.00713 | 0.00006  | 0.0174 | -      | 0.0249 | 0.0144 | 0.08741 | 0.0810 | 0.1233 | 0.0362 | 0.0717  | 0.0601 | 0.0822 | -       | 0.1091 | 0.1048 | 1      | 0.1942 |
|         | 0.1892<br>9 | 2      |         |          |          | 3      | 0.0678 | 5      | 8      |         | 4      | 4      | 3      | 2       | 3      | 6      | 0.0959  | 8      | 4      |        | 2      |
|         | <.0001      | 0.6679 | 0.3761  | 0.8196   | 0.9985   | 0.5773 | 0.0299 | 0.4249 | 0.6433 | 0.0051  | 0.0094 | <.0001 | 0.2465 | 0.0217  | 0.0543 | 0.0084 | 0.0021  | 0.0005 | 0.0008 |        | <.0001 |
| ab_TG   | 0.0482      | -      | -       | 0.00766  | -0.00346 | 0.0187 | -      | -      | 0.0150 | -       | 0.0478 | 0.0113 | -      | 0.0797  | 0.0098 | 0.0691 | 0.1195  | -      | 0.0383 | 0.1942 | 1      |
|         | 8           | 0.0203 | 0.00079 |          |          | 3      | 0.0674 | 0.0024 | 4      | 0.00117 | 3      | 7      | 0.0213 | 6       | 5      | 8      | 9       | 0.0028 | 4      | 2      |        |
|         | 0.1224      | 0.5153 | 0.9799  | 0.8065   | 0.9118   | 0.5493 | 0.0308 | 0.9387 | 0.6305 | 0.9701  | 0.126  | 0.7162 | 0.4943 | 0.0106  | 0.7528 | 0.0268 | 0.0001  | 0.9266 | 0.22   | <.0001 |        |
